# Supplementary material for: Hydrogen bonding interactions and supramolecular networks of pyridine-aryl based thiosemicarbazides and their Zn(ii) complexes
Source: Royal Society of Chemistry journal article supplement (doi:10.1039/c2ce26718g), 2012-12-17
Supplement: c2ce26718g.pdf [file c2ce26718g.pdf]

## Supporting information

for

### Hydrogen bonding interactions and supramolecular networks of pyridine-aryl based thiosemicarbazides and their Zn(II) complexes

Komala Pandurangan, Jonathan A. Kitchen, Thomas McCabe and Thorfinnur Gunnlaugsson\*

School of Chemistry, Trinity College Dublin and Trinity Biomedical Science Institute (TBSI), University of Dublin, Dublin 2, Ireland.

#### Thermal stability of $[\text{Zn}(\mathbf{1})_2]\cdot\text{DMF}$ **6**

Thermal gravimetric analysis (TGA) was performed on red coloured crystalline  $[\text{Zn}(\mathbf{1})_2]\cdot\text{DMF}$  **6**. Thermogram showed a gradual weight loss ~10% (20- 220°C)<sup>1-4</sup> which corresponds to the loss of N,N-dimethyl formamide (DMF) from the pores of the crystalline **6**. The sharp weight loss from 220-350°C most likely corresponds to the decomposition or partial sublimation of the Zn(II) complex. Further third sharp weight loss was observed in a range of 450-720°C and is probably due to the complete decomposition of the complex **6** yielding Zinc oxide as a white solid. Both the sharp peaks attributes to the rest of the weight loss of the zinc complex **6**.

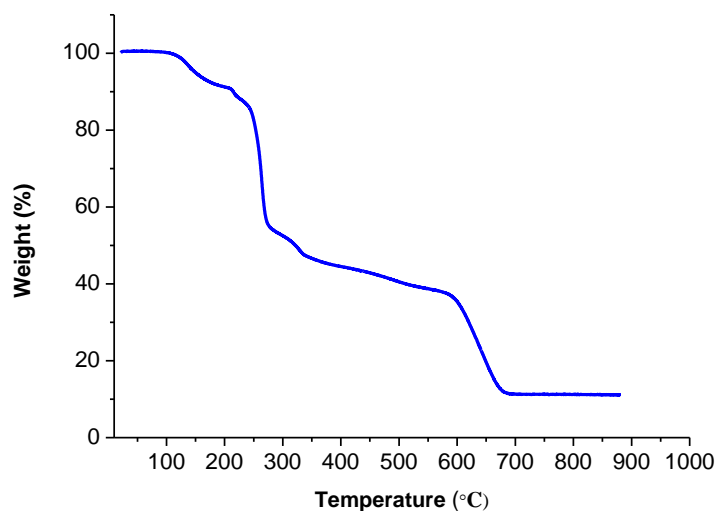

Fig S1: Thermal stability and thermogravimetric analysis (TGA) data for  $[\text{Zn}(\mathbf{1})_2]\cdot\text{DMF}$ , **6** recorded in a nitrogen atmosphere.

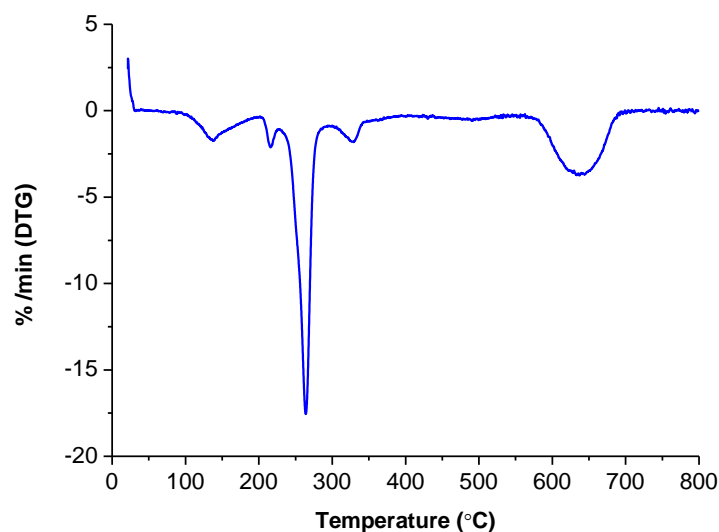

Fig S2: Thermal stability and derivative thermogravimetric analysis (DTGA) data for  $[\text{Zn}(\mathbf{1})_2]\cdot\text{DMF}$ , **6**.

### UV-Vis spectroscopic studies of Zn(II) complex **6** .

The spectroscopic studies of receptors **6** was carried out in acetonitrile using  $1 \times 10^{-5}$  M solution in the cell.

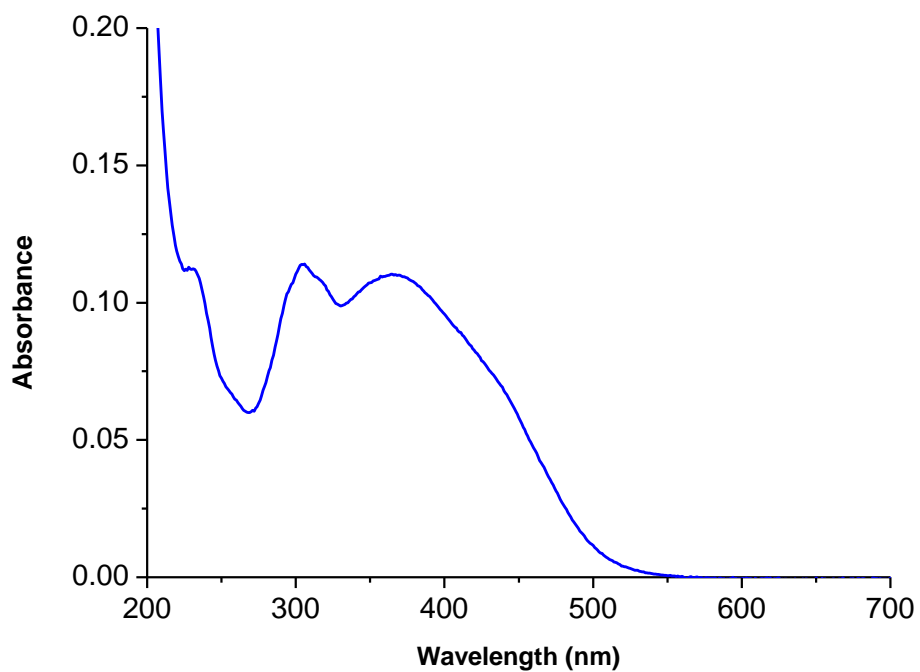

Fig S3: Absorption spectra of Zn(II) complex  $[Zn(1)_2] \cdot DMF$  **6** in  $CH_3CN$ .

### Packing diagram of 1-4

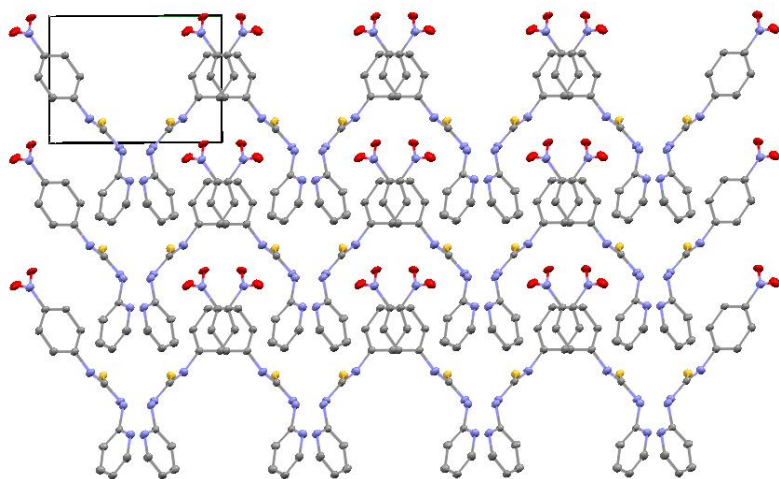

Fig S4: Packing diagram of thiourea **1** (view along c axis).

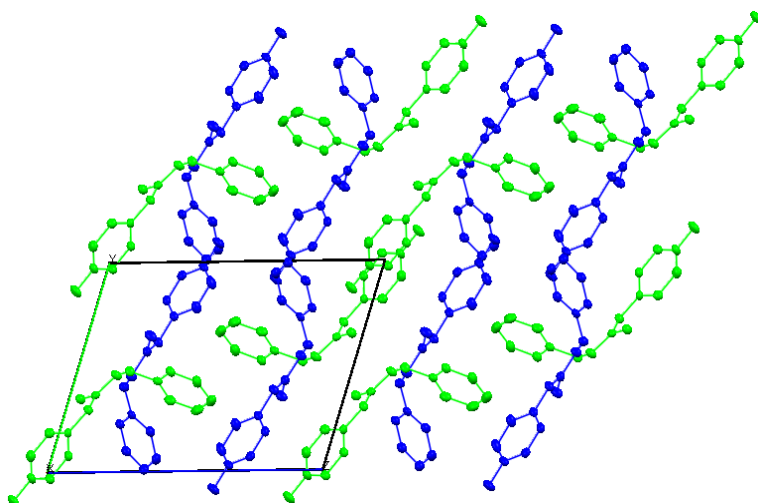

Fig S5: Packing diagram of **2** (view along axis a).

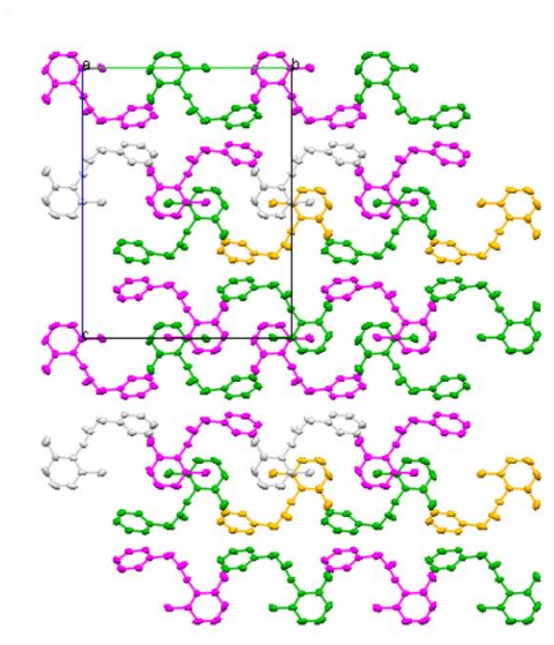

Fig S6: Packing diagram of **3**. (view along axis a)

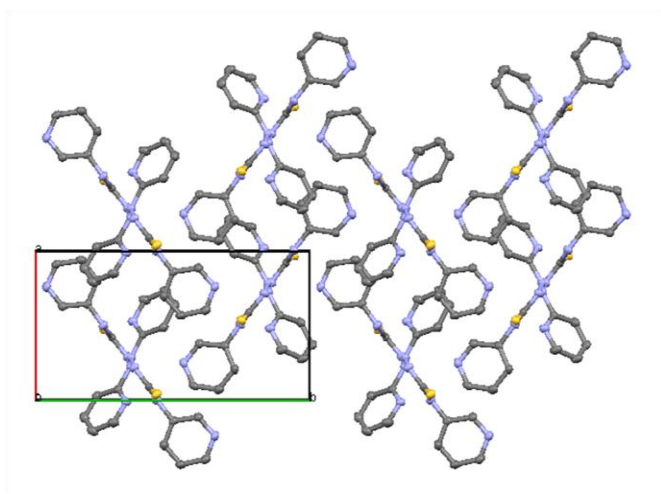

Fig S7: Packing diagram of thiourea **4** (view along c axis).

**Table S1: Selected bond lengths [ $\text{\AA}$ ] and bond angles[ $^\circ$ ] of 6 and 7**

| Bond length           |            | Bond angle        |           |
|-----------------------|------------|-------------------|-----------|
| <b>Zinc complex 6</b> |            |                   |           |
| Zn(1)-N(2)            | 1.9969(14) | N(2)-Zn(1)-S(1)   | 86.73(4)  |
| Zn(1)-S(1)            | 2.2991(4)  | N(2)#1-Zn(1)-S(1) | 121.79(4) |
|                       |            | S(1)#1-Zn(1)-S(1) | 124.18(2) |
| <b>Zinc complex 7</b> |            |                   |           |
| Zn(1)-N(2)            | 1.9969(14) | N(2)-Zn(1)-S(1)   | 86.73(4)  |
| Zn(1)-S(1)            | 2.2991(4)  | N(2)#1-Zn(1)-S(1) | 121.79(4) |
|                       |            | S(1)#1-Zn(1)-S(1) | 124.18(2) |

### Void analysis of 6 and 7

**Table S2: Calculated values of cavity volumes for contact surface of  $[\text{Zn}(\mathbf{1})_2]$ <sup>a</sup> and  $[\text{Zn}(\mathbf{5})_2]$**

| Probe radius ( $\text{\AA}$ ) | $[\text{Zn}(\mathbf{1})_2]$ , 6 <sup>a</sup> | $[\text{Zn}(\mathbf{5})_2]$ , 7 |
|-------------------------------|----------------------------------------------|---------------------------------|
|                               | Void volume ( $\text{\AA}^3$ )               | Void volume ( $\text{\AA}^3$ )  |
| 1.7                           | 432.75 (13.8)                                | 261.11 (8.2)                    |
| 1.6                           | 453.40 (14.5)                                | 323.78 (10.1)                   |
| 1.5                           | 491.99 (15.7)                                | 354.73 (11.1)                   |
| 1.4                           | 521.98 (16.7)                                | 383.55 (12.0)                   |
| 1.3                           | 542.42 (17.3)                                | 462.45 (14.5)                   |
| 1.2                           | 615.10 (19.7)                                | 487.42 (15.3)                   |

<sup>a</sup> Squeeze command was used to remove the disordered DMF.

### References:

- 1) Roberts, J. M.; Fini, B. M.; Sarjeant, A. A.; Farha, O. K.; Hupp, J. T.; Scheidt, K. A. *J. Am. Chem. Soc.*, **2012**, *134*, 3334.
- 2) Chen, B.; Wang, X.; Zhang, Q.; Xi, X.; Cai, J.; Qi, H.; Shi, S.; Wang, J.; Yuan, D.; Fang, M. *J. Mater. Chem.*, **2010**, *20*, 3758.
- 3) Sapchenko, S. A.; Dybtsev, D. N.; Samsonenko, D. G.; Fedin, V. P. *New J. Chem.*, **2010**, *34*, 2445.
- 4) Pachfule, P.; Das, R.; Poddar, P.; Banerjee, R. *Crystal Growth & Design* **2011**, *11*, 1215.
